# Supplementary material for: Laboratory validation of a clinical metagenomic next-generation sequencing assay for respiratory virus detection and discovery
Source: Research Square preprint supplement (doi:10.21203/rs.3.rs-4492202/v1), 2024-05-31
Supplement: Supplementary file 1 [file a342a710cae397b01821e587.docx]

**SUPPLEMENTARY MATERIAL**

**Supplementary Table 1. Evaluation and interpretation of human background based on detection of MS2 phage and/or viral reads.**

| **Result*** | **Interpretation** |
| --- | --- |
| MS2 phage DETECTED; viral pathogen DETECTED | Results are valid. |
| MS2 phage NOT DETECTED; viral pathogen DETECTED | Results are valid. |
| MS2 phage DETECTED; viral pathogen NOT DETECTED | Results are valid. |
| MS2 phage NOT DETECTED; viral pathogen NOT DETECTED | Results are invalid. |

* All possible outcomes regarding the validity of mNGS testing based on detection of MS2 and/or a viral pathogen in the clinical sample.

**Supplementary Table 2. Evaluation of human background based on ERCC RNA spike-in quantifications results.**

| **IC RPM Ratio Range*** | **Interpretive Comment** |
| --- | --- |
| >5 | Due to very low host background, estimated limits of detection in this clinical sample are approximately 1 log lower than the stated limits of detection for this test. |
| 0.5 – 5 | None |
| 0.05 – 0.5 | Due to moderate host background, estimated limits of detection in this clinical sample are approximately 1 log higher than the stated limits of detection for this test. |
| 0.005 – 0.05 | Due to high host background, estimated limits of detection in this clinical sample are approximately 2 logs higher than the stated limits of detection for this test. |
| 0 – 0.005 | Due to very high host background, estimated limits of detection in this clinical sample are approximately 3 logs higher than the stated limits of detection for this test. |

*. Abbreviations: ERCC, External RNA Controls Consortium; IC, internal control; NC, negative control; RPM, reads per million.

**Supplementary Table 3. Assessment of exclusivity by testing of a mixture of 10 non-viral organisms (bacteria and fungi) from a commercially available microbial community standard.**

|  |  | ZymoBIOMICS™ Standard Replicate 1 (RPM ratio) | ZymoBIOMICS™ Standard Replicate 2 (RPM ratio) | ZymoBIOMICS™ Standard Replicate 3 (RPM ratio) |
| --- | --- | --- | --- | --- |
| RNA Viral  Pathogen |  | Not detected | Not detected | Not detected |
| Bacteria | *Pseudomonas aeruginosa* | 109,961 | 100,759 | 100,425 |
| *Escherichia coli* | 2,775 | 2,911 | 2,886 |
| *Salmonella enterica* | 249,809 | 264,668 | 260,984 |
| *Lactobacillus fermentum* | 366,693 | 364,440 | 366,732 |
| *Enterococcus faecalis* | 240,805 | 247,572 | 248,073 |
| *Staphylococcus aureus* | 3,097 | 3,011 | 3,069 |
| *Listeria monocytogenes* | 150,586 | 150,851 | 151,388 |
| *Bacillus subtilis* | 2.11 | 2.16 | 2.14 |
| Fungi | *Saccharomyces cerevisiae* | 210,062 | 205,745 | 208,848 |
| *Cryptococcus neoformans* | 309,698 | 291,633 | 296,407 |
| Internal Spiked RNA Viral Control | *Escherichia* phage MS2 | 0.20 | 0.09 | 0.10 |

Reads per million (RPM) ratios for bacteria, fungi, and an internal spiked *Escherichia coli* MS2 RNA phage control detected in three replicate samples of the ZymoBIOMICS™ Microbial Community Standard (Zymo Research). The RPM ratio is calculated as RPMsample / RPMNTC, where NTC is the non-template control.

**Supplementary Table 4. Interference study results for mucoid BAL samples (n=14)**

*Analysis of 14 PCR-positive bronchoalveolar lavage samples to evaluate the potential matrix effect from samples with high host background; invalid runs, with neither detection of spiked MS2 phage nor a respiratory virus, were excluded from the analysis. Abbreviations: ERCC, External RNA Controls Consortium; ST, subthreshold; BAL, bronchoalveolar lavage; RPM, reads per million.

**Supplementary Table 5. Discrepant mNGS Positive Results Compared to Original Viral Respiratory Panel Clinical Testing (n = 14 Samples)**

| **Organisms Detected by Clinical RVP** | **Organisms Detected by mNGS** | **Results of Discrepancy Testing** | **Additional Data** | **Final Result of mNGS by DTCA** |
| --- | --- | --- | --- | --- |
| RSV | RSV  Rhinovirus B | (+) Rhinovirus |  | **TP** RSV  **TP** Rhinovirus |
| RSV | RSV  EV-D68 | (+) Enterovirus |  | **TP** RSV  **TP** Enterovirus |
| RSV | RSV  Adenovirus C | (+) Adenovirus |  | **TP** RSV  **TP** Adenovirus |
| Adenovirus Metapneumovirus | Adenovirus C  Metapneumovirus  Bocavirus | Bocavirus ND | Bocavirus mNGS reads are specific to the viral genus. Patient with clinical syndrome consistent with acute viral respiratory infection. | **TP** Adenovirus  **TP** Metapneumovirus  **TP** Bocavirus |
| ND | Coronavirus OC43 | Coronavirus OC43 ND | Detected by mNGS x 2 with high RPM and high coverage. No evidence of cross-contamination. Patient with clinical syndrome consistent with acute viral respiratory infection. | **TP** Coronavirus OC43 |
| ND | Coronavirus OC43 | (+) Coronavirus OC43 |  | **TP** Coronavirus OC43 |
| ND | Rhinovirus A | (+) Rhinovirus |  | **TP** Rhinovirus |
| ND | Rhinovirus A | (+) Rhinovirus |  | **TP** Rhinovirus |
| ND | Coronavirus HKU1 | Coronavirus HKU1 ND |  | **FP** Coronavirus HKU1 |
| ND | Coronavirus HKU1 | (+) Coronavirus HKU1 |  | **TP** Coronavirus HKU1 |
| ND | Parainfluenza 1  SARS-CoV-2 | (+) Parainfluenza 1  SARS-CoV-2 ND |  | **TP** Parainfluenza 1  **FP** SARS-CoV-2 |
| ND | Coronavirus NL63 | (+) Coronavirus NL63 |  | **TP** Coronavirus NL63 |
| ND | Rhinovirus C | Rhinovirus ND | Mismatches in the forward primer and probe sequences for rhinovirus/enterovirus PCR. No evidence of contamination. Patient with clinical syndrome consistent with acute viral respiratory infection. | **TP** Rhinovirus |
| ND | Coronavirus OC43 | NT |  | **NA** Coronavirus OC43 |
| False positive results were only considered if the organism was included as a target for RVP. Each result was assessed independently, in case of multiple positive results (multiple organisms), the corresponding TP/FP call was divided by the number of organisms detected within each sample (e.g. 1 TP + 1 FP in a same sample = ½ TP + ½ FP). This allowed to keep the observation constant (see Methods for further details). Abbreviations: RVP, respiratory viral panel; DTCA, discrepancy testing and clinical adjudication; RSV, respiratory syncytial virus; EV-D68, enterovirus D68; RPM, reads per million; ND, not detected; NT, not tested; TP, true positive; FP, false positive; NA, not available. | | | | |

**Supplementary Table 6. Discrepant mNGS Negative Results Compared to Original Viral Respiratory Panel Clinical Testing (n = 9 Samples)**

| **Organisms Detected**  **By Clinical RVP** | **CT Value or MFI**  **from Clinical RVP** | **Organisms Detected by mNGS** | **High Host Background?** | **Results of Discrepancy Testing** | **Discrepancy Testing Platform** | **Final Result of mNGS by DTCA** |
| --- | --- | --- | --- | --- | --- | --- |
| Influenza A  Parainfluenza 3 | NA | Influenza A | Y | (+) Influenza A  Parainfluenza 3 ND | MagPix | **TP** Influenza A  **TN** Parainfluenza 3 |
| Influenza A and  SARS-CoV-2 | SARS-CoV-2 CT: 36.4 | Influenza A | Y | Influenza A NT  SARS-CoV-2 ND | Verigene | **TP** Influenza A  **TN** SARS-CoV2 |
| Influenza A  RSV | NA | ND | Y | Influenza A ND  (+) RSV B | GenMark | **TN** Influenza A  **FN** RSV |
| Influenza A and  SARS-CoV-2 | NA | SARS-CoV-2 | N | Influenza A ND  SARS-CoV-2 NT | MagPix | **TP** SARS-CoV-2  **TN** Influenza A |
| Rhinovirus/Enterovirus | Rhinovirus/Enterovirus MFI: 52 | ND | Y | Rhinovirus/Enterovirus ND | MagPix | **TN** Rhinovirus/Enterovirus |
| Rhinovirus/Enterovirus | NA | ND | N | Rhinovirus/Enterovirus ND | MagPix | **TN** Rhinovirus/Enterovirus |
| Rhinovirus/Enterovirus  Parainfluenza 2 | NA | Rhinovirus A | N | (+) Rhinovirus/Enterovirus Parainfluenza 2 ND | MagPix | **TP** Rhinovirus/Enterovirus  **TN** Parainfluenza 2 |
| Metapneumovirus | NA | ND | Y | (+) Metapneumovirus | GenMark | **FN** Metapneumovirus |
| RSV A | NA | ND | Y | RSV ND | MagPix | **TN** RSV A |

Abbreviations: RVP, respiratory viral panel; MFI, mean fluorescence units; DTCA, discrepancy testing and clinical adjudication; RSV, respiratory syncytial virus; ND, not detected; Y, yes; N, no; NA, not available; NT, not tested; TP, true positive; FN, false negative; MAGPIX, Luminex MagPix® system for RVP testing; GenMark, Genmark ePlex® Respiratory Pathogen Panel 2 for RVP testing; Verigene, Verigene® Respiratory Pathogen Flex Test for RVP testing.

**Supplementary Table 7. Costs for the UCSF viral respiratory mNGS assay.**

| **Name of Test** | UCSF Viral Respiratory mNGS Assay | |
| --- | --- | --- |
| No. specimens per run (3 runs/week) | 11 |  |
| Total # of patient tests performed annually | 1,716 |  |
| No. Controls per run (positive and negative controls) | 2 |  |
| **Total samples per run (Patient & Controls)** | 13 |  |
| **REAGENTS & SUPPLIES:** | Price/unit | Reagent cost/test |
| KingFisher extraction with DNase treatment (500 tests/unit) | 3,604.80 | 38.86 |
| Tecan DNA Seq kits (32 tests/unit) | 1,550.00 | 48.44 |
| NextSeq Mid Output (13 tests/unit) | 1,178.10 | 90.62 |
| **Sun-Total reagent & supply costs** |  | 177.92 |
| % adjustment for consumables | 20% |  |
| **Total + % adjustment for consumables** |  | 213.50 |
| **Supply Cost per Run** |  | 2,312.97 |
| **Supply cost per patient sample** |  | **210.27** |
| Annual Service Cost: KingFisher extraction $7000, Tecan Magicprep $6,000.00, NextSeq $35,293.50 | 53,649.50 |  |
| **Service cost/test** |  | 31.26 |
| Instrument purchase price (if purchased) Analysis server $60,000, Data storage server $30,000, KingFisher $64,578.65 | 154,578.65 |  |
| **Instrument cost per test** |  | 18.02 |
| **TOTAL INST/ SUPPLY COST PER TEST** |  | **259.55** |
| Labor time |  | minutes |
| Prepare/clean work areas -both pre & post PCR |  | 15.00 |
| extraction (automated) |  | 30.00 |
| cDNA_DNA_protocol |  | 60.00 |
| MagicPrep preperation - hands on |  | 15.00 |
| MagicPrep library (automated) |  | 0.00 |
| Qubit & NextSeq loading |  | 60.00 |
| Bioinformatic (SURPI, server time) |  | 15.00 |
| Post analysis Reporting Sunquest |  | 5.00 |
| **Labor/run (mins)** |  | 200.00 |
| **Labor/sample (mins)** |  | 18.18 |
| Daily maintenance (mins) |  | 15.00 |
| **Total Labor (min)** |  | 33.18 |
| **TOTAL LABOR COST PER TEST** |  | **33.18** |
| **TOTAL COST PER TEST** |  | **292.73** |

**Supplementary Figure 1.** **Evaluation of linearity and viral load quantification for the mNGS assay. (A)** A quantified SARS-CoV-2 PCR-positive nasopharyngeal swab from a patient with COVID-19 was serially diluted in donor nasal swab matrix and tested across 4 log10 dilutions. **(B)** A quantified HCV PCR-positive plasma sample from a patient with hepatitis C infection was serially diluted in donor plasma and tested across 4 log10 dilutions. At each dilution, the calculated mean concentration from three replicates is plotted against the expected concentration on a log scale, and the R2 correlation coefficient is determined by linear regression.

**
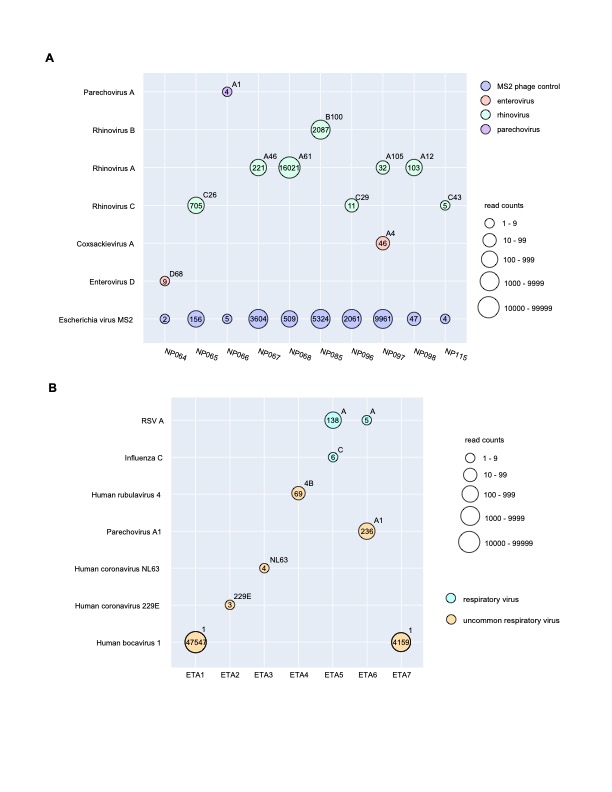
**

**Supplementary Figure 2. Demonstration of inclusivity and clinical use cases for the mNGS assay. (A)** Genotyping of rhinovirus and enterovirus subtypes from PCR-positive nasal swab samples. Conventional clinical multiplex RT-PCR tests do not distinguish between rhinoviruses and enteroviruses, nor are they able to subtype more pathogenic strains such as rhinovirus C or enterovirus D68 in association with acute flaccid myelitis1,2. **(B)** Detection of uncommon or rare viral pathogens causing respiratory infections in critically ill mechanically ventilated hospitalized patients. The circles correspond to detected viruses, and are color-coded by virus and scaled by read counts. For each detected virus, the read count is shown in the circle, while the identified genotype after SURPI+ pipeline is shown in the upper right quadrant. Abbreviations: ETA, endotracheal aspirate.

**Supplementary Figure 3.** **In-depth analysis of a rhinovirus C detection by mNGS that was discrepant with RT-PCR. (A)** A heat map generated from SURPI+ analysis shows 12 reads aligning to rhinovirus C from a single sample, excluding the possibility of cross-contamination. Each column denotes a clinical sample, while each row corresponds to a taxonomic identification at the species, genus, or family level. The asterisks refer to “declassification” of reads from one level to the next higher taxonomic level (for example, from species to genus). **(B)** A coverage map shows that the 12 reads span the genome of the most closely matched rhinovirus C genome in the reference database identified by SURPI+ (accession number MG148341.1) without overlap, with coverage of 19% of the ~7,000 base pair (bp) genome. **(C)** Several mismatches in the primer and probe sequences from published RT-PCR assays targeting the 5’-untranslated region (5’-UTR) are observed when compared to the viral mNGS reads, providing a likely explanation for the discrepant mNGS and RT-PCR results. The four assays are labeled 1 through 4 and correspond to Lu, et al.3 (1), Tapparel, et al.4 (2), Gunson, et al.5 (3), and Steininger, et al.6 (4). The mismatched nucleotides are highlighted with a background color. Note that the assay from Steininger, et al. does not include a probe. Abbreviations: FP, forward primer; Pr, probe. RP, reverse primer.

**References**

1. Greninger, A.L.*, et al.* A novel outbreak enterovirus D68 strain associated with acute flaccid myelitis cases in the USA (2012-14): a retrospective cohort study. *Lancet Infect Dis* **15**, 671-682, doi: 10.1016/S1473-3099(15)70093-9 (2015).

2. Messacar, K.*, et al.* Enterovirus D68 and acute flaccid myelitis-evaluating the evidence for causality. *Lancet Infect Dis* **18**, e239-e247, doi: 10.1016/S1473-3099(18)30094-X (2018).

3. Lu, X.*, et al.* Real-time reverse transcription-PCR assay for comprehensive detection of human rhinoviruses. *J Clin Microbiol* **46**, 533-539, doi: 10.1128/JCM.01739-07 (2008).

4. Tapparel, C.*, et al.* New respiratory enterovirus and recombinant rhinoviruses among circulating picornaviruses. *Emerg Infect Dis* **15**, 719-726, doi: 10.3201/eid1505.081286 (2009).

5. Gunson, R.N., Collins, T.C. & Carman, W.F. Real-time RT-PCR detection of 12 respiratory viral infections in four triplex reactions. *J Clin Virol* **33**, 341-344, doi: 10.1016/j.jcv.2004.11.025 (2005).

6. Steininger, C., Aberle, S.W. & Popow-Kraupp, T. Early detection of acute rhinovirus infections by a rapid reverse transcription-PCR assay. *J Clin Microbiol* **39**, 129-133, doi: 10.1128/JCM.39.1.129-133.2001 (2001).
