# Supplementary material for: Laboratory validation of a clinical metagenomic next-generation sequencing assay for respiratory virus detection and discovery
Source: Research Square preprint supplement (doi:10.21203/rs.3.rs-4492202/v1), 2024-05-31
Supplement: Supplementary file 2 [file eb8b82f73ff19fbb059e8efc.xlsx]

## Sheet: Supplementary Dataset 1
Sample ID	Sample Type	PCR Results	mNGS Results	Viral Load (copies/ml)	Clinical Diagnosis	Disease Severity (0=asymptomatic, 1=mild respiratory symptoms without wheezing/SOB/dyspnea, 2=moderate -- requires hospitalization and/or treatment (e.g., steroids) and/or oxygen and/or dyspnea/SOB/wheezing, 3=severe, ICU, pneumonia, mechanical ventilation or high oxygen requirement)	Symptoms	Discrepancy Testing (Ct value)	Comments
P-NP-1	upper respiratory swab	RSV+	RSV A+	2000000	upper respiratory infection (croup)	2	cough,wheezing,fever,seal-like barking,	-	Patient sample tested by Flu A/B/RSV PCR only
			Rhinovirus B+	12000000				Rhinovirus = 22.3
P-NP-2	upper respiratory swab	RSV+	RSV A+	150000000	upper respiratory infection with otitis media	2	wheezing, cough	-	-
P-NP-3	upper respiratory swab	Flu A (H3) +	Flu A (H3N2) +	18000000	pancytopenia, asymptomatic	0	pancytopenia, asymptomatic	-	-
P-NP-5	upper respiratory swab	RSV+	RSV A+	16000	upper respiratory infection	1	sore throat, cough, lightheadedness without fever or SOB	-	-
P-NP-6	upper respiratory swab	RSV+	RSV B+	5400000	ear pain	0	ear pain but no respiratory symptoms	-	Patient sample tested by Flu A/B/RSV PCR only
			EVD68+	81000				Enterovirus = 36.7
P-NP-7	upper respiratory swab	Flu A (H3)+	Flu A (H3)+	19000	fever	1	fever , chills, and headache	-	-
		SARS-CoV-2 +	SARS-CoV-2 +	3800000				-	-
P-NP-8	upper respiratory swab	SARS-CoV-2 +	SARS-CoV-2 +	5200000000	upper respiratory infection	1	cough, nasal congestion, fever	-	-
P-NP-10	upper respiratory swab	SARS-CoV-2 +	SARS-CoV-2 +	120000	hypervolemia with shortness of breath	1	shortness of breath / dyspnea attributed to volume overload, on minimal oxygen	-	-
P-NP-11	upper respiratory swab	SARS-CoV-2 +	SARS-CoV-2 +	1100000	asymptomatic viral infection	0	tested positive for COVID-19 no symptoms	-	-
P-NP-13	upper respiratory swab	Flu A+	Flu A+ (H3N2)	62000000	upper respiratory infection	1	fever, headache, vomiting, wheezing	-	-
P-NP-14	upper respiratory swab	RSV +	RSV A+	1800000	bronchiolitis	2	productive cough, fever, vomiting	-	-
P-NP-15	upper respiratory swab	RSV A+	RSV+	3600000	upper respiratory infection	1	cough and nasal congestion	-	-
P-NP-16	upper respiratory swab	Rhinovirus/Enterovirus+	Rhinovirus C+	280000	upper respiratory infection	1	cough, congestion, fever	-	-
	upper respiratory swab	RSV+	RSV A+	67000				-	-
P-NP-17	upper respiratory swab	Flu A+	Flu A+ (H3N2)	540000000	upper respiratory infection	1	fever, nasal congestion, cough	-	-
P-NP-18	upper respiratory swab	Flu A+	Flu A+ (H3N2)	3200000	bronchiolitis	2	fever, cough, and hypoxia	-	-
P-NP-19	upper respiratory swab	Flu A+	Flu A+ (H3N2)	8600000	upper respiratory infection	1	failure to thrive, cough, congestion	-	1 read detected for parainFluenza virus (subthreshold result)
	upper respiratory swab	ParainFluenza 3+	ParainFluenza 3 not detected	-				-
P-NP-20	upper respiratory swab	RSV B+	RSV B+	490000	bronchiolitis	2	fever, cough, decreased oxygen saturations, bronchiolitis on CXR	-	-
P-NP-21	upper respiratory swab	SARS-CoV-2+	SARS-CoV-2+	24000000	pneumonia with renal failure	3	fever, SOB, and renal insufficiency	-	-
P-NP-22	upper respiratory swab	SARS-CoV-2+	SARS-CoV-2+	46000	asymptomatic viral infection	0	no respiratory symptoms (recovered from COVID-19)	-	-
P-NP-23	upper respiratory swab	SARS-CoV-2+	SARS-CoV-2+	4300000	asymptomatic viral infection	0	no respiratory symptoms (recovered from COVID-19)	-	-
	upper respiratory swab		Betaherpesvirus 7		asymptomatic viral infection	0	no respiratory symptoms (recovered from COVID-19)	-	-
P-NP-25	upper respiratory swab	SARS-CoV-2+	SARS-CoV-2+	19000000	upper respiratory infection	1	congestion, rhinorrhea, sneezing, lymphopenic	-	-
P-NP-26	upper respiratory swab	RSV +	RSV A+	4400000	upper respiratory infection	1	cough, fever	-	-
P-NP-27	upper respiratory swab	RSV +	RSV A+	5500000	upper respiratory infection	1	fever, cough, runny nose	-	-
P-NP-28	upper respiratory swab	Flu A+	Flu A+ (H3N2)	80000	upper respiratory infection	1	cough, myalgias	-	-
	upper respiratory swab		Papillomavirus Type 21		upper respiratory infection	1	cough, myalgias	-	-
P-NP-29	upper respiratory swab	Flu A+	Flu A+ (H3N2)	9600000	upper respiratory infection	1	fever, nasal congestion	-	-
P-NP-30	upper respiratory swab	Flu A+	Flu A+ (H3N2)	26000000	upper respiratory infection with dehydration and electrolyte disturbances	2	dehydration, poor oral intake, runny nose, cough, fever	-	-
P-NP-31	upper respiratory swab	Flu A+	Flu A+ (H3N2)	3900000	fever, vomiting, and anorexia	2	cough, fever, and vomiting	-	-
P-NP-33	upper respiratory swab	Flu A+	Flu A+	21000000	fever and SOB	2	fever, cough, SOB treated with dexamethasone	-	-
	upper respiratory swab	SARS-CoV-2+	SARS-CoV-2 not detected	-				-	-
P-NP-34	upper respiratory swab	RSV+	RSV A+	6400000	upper respiratory infection	1	congestion, rhinorrhea, cough	-	-
P-NP-35	upper respiratory swab	RSV+	RSV B+	220000	upper respiratory infection	1	fever	-	-
P-NP-36	upper respiratory swab	RSV+	RSV not detected	-	fever	1	fever, no congestion, no respiratory symptoms	-	Patient sample tested by Flu A/B/RSV PCR only
	upper respiratory swab		Adenovirus C+	2500000	fever	1	fever, no congestive, no respiratory symptoms	-
P-NP-37	upper respiratory swab	RSV+	RSV A+	920000	upper respiratory infection	1	fever, nasal congestion	-	-
P-NP-38	upper respiratory swab	RSV+	RSV B+	46000000	bronchiolitis	2	cough, vomiting, fever, bronchiolitis	-	-
P-NP-40	upper respiratory swab	Flu A+	Flu A+	160000	cardiogenic shock	0	cardiogenic shock with inFluenza A infection thoguht incidental	-	-
	upper respiratory swab		Papillomavirus Type 70					-	-
P-NP-41	upper respiratory swab	SARS-CoV-2 +	SARS-CoV-2 +	470000	asymptomatic viral infection	0	no symptoms; tested routinely found to be COVID-19 (+)	-	-
P-NP-42	upper respiratory swab	SARS-CoV-2 +	SARS-CoV-2 +	4100000	upper respiratory infection	1	cough	-	-
P-NP-43	upper respiratory swab	SARS-CoV-2 +	SARS-CoV-2 +	140	upper respiratory infection	1	cough, nausea, fatigue	-	-
P-NP-44	upper respiratory swab	SARS-CoV-2 +	SARS-CoV-2 +	32000	upper respiratory infection	1	cough	-	-
P-NP-45	upper respiratory swab	SARS-CoV-2 +	SARS-CoV-2 +	110000	upper respiratory infection	1	new diagnosis while in hospital with cough	-	-
P-NP-46	upper respiratory swab	RSV B+	RSV B+	1500000	upper respiratory infection	1	cough, runny nose	-	-
	upper respiratory swab		Betaherpesvirus 7		upper respiratory infection	1	cough, runny nose	-	-
P-NP-47	upper respiratory swab	RSV A+	RSV A+	1700000	upper respiratory infection	1	cough, congestion, fever	-	-
P-NP-50	upper respiratory swab	RSV B+	RSV B+	1400000	respiratory failure and septic shock	3	respiratory failure and septic shock from RSV diagnosed 4 days prior	-	-
P-NP-59	upper respiratory swab	SARS-CoV-2 +	SARS-CoV-2 +	130000	upper respiratory infection	1	fever, congestion, and cough	-	-
P-NP-60	upper respiratory swab	SARS-CoV-2 +	SARS-CoV-2 +	42000000	asymptomatic viral infection	0	asymptomatic COVID-19 on screening	-	-
P-NP-61	upper respiratory swab	SARS-CoV-2 + and Rhinovirus +	SARS-CoV-2 +	1400000	hypoxia and lymphoma-related lactic acidosis	1	hypoxia and lymphoma-related lactic acidosis	-	-
	upper respiratory swab		Rhinovirus C	1200000				-	-
P-NP-62	upper respiratory swab	SARS-CoV-2 +	SARS-CoV-2 +	1700000	upper respiratory infection	1	cough, malaise, fatigue, low-grade fever	-	-
P-NP-63	upper respiratory swab	SARS-CoV-2 +	SARS-CoV-2 +	24000	asymptomatic viral infection	0	orthopedic surgery; incidentally detected	-	-
P-NP-64	upper respiratory swab	Flu A (H3) + and SARS-CoV-2 +	SARS-CoV-2 +	190000	fever	1	fever, no respiratory symptoms, pregnant	-	-
P-NP-65	upper respiratory swab	SARS-CoV-2 +	SARS-CoV-2 +	4300000	upper respiratory infection	1	cough, congestion	-	-
P-NP-66	upper respiratory swab	SARS-CoV-2 +	SARS-CoV-2 +	2700000	croup and generalized muscle weakness	2	worsening cough, croup, worsening weakness in patient with myasthenia gravis due to COVID-19	-	-
	upper respiratory swab		Papillomavirus					-	-
P-NP-67	upper respiratory swab	SARS-CoV-2 +	SARS-CoV-2 +	11000000	pneumonia	2	fatigue, weakness, vomiting, pneumonia, hospitalized	-	-
	upper respiratory swab		Papillomavirus					-	-
P-NP-68	upper respiratory swab	SARS-CoV-2 +	SARS-CoV-2 +	190000	upper respiratory infection	1	cough and weakness	-	-
P-NP-69	upper respiratory swab	SARS-CoV-2 +	SARS-CoV-2 +	130000	asymptomatic viral infection	0	asymptomatic COVID-19 in a hospitalized patient	-	-
P-NP-70	upper respiratory swab	SARS-CoV-2 +	SARS-CoV-2 +	84000000	upper respiratory infection	1	myagias, congestion, subjective fevers	-	-
P-NP-71	upper respiratory swab	SARS-CoV-2 +	SARS-CoV-2 +	2500000	asymptomatic viral infection	0	asymptomatic COVID-19 in a hospitalized patient	-	-
P-NP-72	upper respiratory swab	SARS-CoV-2 +	SARS-CoV-2 +	110000000	pneumonia	3	cardiopulmonary failure with worsneing pneumonia due to COVID-19	-	-
P-NP-73	upper respiratory swab	SARS-CoV-2 +	SARS-CoV-2 +	41000000	asymptomatic viral infection	0	asymptomatic COVID-19 in patient with brain mass	-	-
P-NP-74	upper respiratory swab	SARS-CoV-2 +	SARS-CoV-2 +	25000000	pneumonia	2	shortness of breath with COVID-19 pneumonia	-	-
P-NP-75	upper respiratory swab	SARS-CoV-2 +	SARS-CoV-2 +	63000000	pneumonia	2	SOB, dry cough, and palpitations	-	-
P-NP-76	upper respiratory swab	SARS-CoV-2 +	SARS-CoV-2 +	6300000	upper respiratory infection	1	mild COVID-19 symptoms	-	-
P-NP-77	upper respiratory swab	SARS-CoV-2 +	SARS-CoV-2 +	35000000	pneumonia	3	fever, cough, SOB evolving into respiratory failure	-	-
P-NP-78	upper respiratory swab	SARS-CoV-2 +	SARS-CoV-2 +	10000000	upper respiratory infection	1	cough, runny nose in patient with B-cell aplasia status-post CAR-T therapy	-	-
P-NP-79	upper respiratory swab	SARS-CoV-2 +	SARS-CoV-2 +	25000000	lower respiratory infection	2	hypoxia	-	-
P-NP-80	upper respiratory swab	SARS-CoV-2 +	SARS-CoV-2 +	37000000	upper respiratory infection	1	mild illness from COVID-19	-	-
N-NP-10	upper respiratory swab	Metapneumovirus +	Metapneumovirus	NA	pneumonia	2	fever, cough, exam suggestive of L-sided pneumonia	-	-
N-NP-14	upper respiratory swab	Adenovirus +	Mastadenovirus E	NA	upper respiratory infection	1	Fever, sore throat, cough, nasal congestion, and rhinorrhea	-	-
P-NP-83	upper respiratory swab	Rhinovirus/Enterovirus + and Adenovirus +	Rhinovirus A	5700	bronchiolitis (croup)	2	croup requiring decadron and rac epi in setting of adenovirus, re-presenting with increased stridor found to be rhinovirus +	-	-
	upper respiratory swab		Mastadenovirus B	860				-	-
P-NP-84	upper respiratory swab	Rhinovirus/Enterovirus +	Rhinovirus A	83000	asymptomatic viral infection	0	persistently rhinovirus positive, no symptoms	-	-
	upper respiratory swab		CMV					-	-
P-NP-85	upper respiratory swab	Rhinovirus/Enterovirus +	Rhinovirus A	540000	upper respiratory infection	1	cough	-	-
	upper respiratory swab		CMV		upper respiratory infection	1	cough	-	-
	upper respiratory swab		Papillomavirus		upper respiratory infection	1	cough	-	-
P-NP-86	upper respiratory swab	Rhinovirus/Enterovirus +	Rhinovirus C	8200	bronchiolitis	3	severe wheezing and hypoxia requiring treatment in ICU	-	-
P-NP-87	upper respiratory swab	Rhinovirus/Enterovirus +	Rhinovirus C	15000	asymptomatic viral infection	0	asymptomatic rhinovirus infection	-	-
P-NP-89	upper respiratory swab	Rhinovirus/Enterovirus +	Rhinovirus A	5600	asymptomatic viral infection	0	asymptomaticc rhinovirus infection	-	-
P-NP-90	upper respiratory swab	Rhinovirus/Enterovirus +	Rhinovirus A	1500	upper respiratory infection	1	dry cough, no oxygen requirement	-	-
	upper respiratory swab		CMV		upper respiratory infection	1	dry cough, no oxygen requirement	-	-
P-NP-91	upper respiratory swab	Rhinovirus/Enterovirus +	Rhinovirus A	250000	upper respiratory infection	1	cough and nasal congestion	-	-
P-NP-92	upper respiratory swab	Rhinovirus/Enterovirus +	Rhinovirus C	550000	asymptomatic viral infection	0	asymptomatic rhinovirus infection	-	-
P-NP-94	upper respiratory swab	Rhinovirus/Enterovirus +	Rhinovirus A	200000000	hypoxic respiratory failure	3	hypoxic respiratory failure	-	-
P-NP-95	upper respiratory swab	Rhinovirus/Enterovirus +	Rhinovirus C	16000	asymptomatic viral infection	0	asymptomatic rhinovirus infection	-	-
P-NP-96	upper respiratory swab	Rhinovirus/Enterovirus +	Rhinovirus A	70000	cough	1	chronic infection with 1 month of non-productive cough	-	-
	upper respiratory swab		Papillomavirus Type 36					-	-
P-NP-97	upper respiratory swab	Rhinovirus/Enterovirus +	Rhinovirus A	850000	cough	1	chronic infection with 1 month of non-productive cough	-	-
	upper respiratory swab		Papillomavirus					-	-
P-NP-98	upper respiratory swab	Rhinovirus/Enterovirus +	Rhinovirus A	250000	asymptomatic rhinovirus infection	0	asymptomatic rhinovirus infection	-	-
P-NP-99	upper respiratory swab	Rhinovirus/Enterovirus +	Respiratory virus not detected	-	upper respiratory infection	1	mild worsening of chronic lung disease\	-	False Negative
P-NP-100	upper respiratory swab	Rhinovirus/Enterovirus +	Respiratory virus not detected	-	upper respiratory infection	1	positive rhinovirus with cough	-	False Negative
P-NP-101	upper respiratory swab	Rhinovirus/Enterovirus + and ParainFluenza 2+	Rhinovirus A	130000	upper respiratory infection	1	cough, congestion	-	-
P-NP-102	upper respiratory swab	Rhinovirus/Enterovirus +	Rhinovirus A	87000000	apnea and cyanosis from respiratory infection	3	patient with apnea, cyanosis, and bradycardia, intubated in the emergency department for increasing frequency of apneas, hypercarbia, and somnolence.	-	-
P-NP-104	upper respiratory swab	ParainFluenza 1	Respirovirus 1	25	neutropenic fever	1	neutropenic fever	-	-
P-NP-105	upper respiratory swab	ParainFluenza 3	Respirovirus 3	150000	cough, increased secretions	1	cough and increased secretions in a patient intubated for a non-infectious reason	-	-
P-NP-106	upper respiratory swab	Metapneumovirus +	Metapneumovirus	790	upper respiratory infection	1	runny nose, cough, head congestion	-	-
P-NP-107	upper respiratory swab	ParainFluenza 1	Respirovirus 1	680000	upper respiratory infection	1	fever, congestion, cough	-	-
P-NP-108	upper respiratory swab	Adenovirus +	Mastadenovirus C	680000	upper respiratory infection	1	fever, nasal congestion	-	-
P-NP-109	upper respiratory swab	Metapneumovirus +	Respiratory virus not detected	0	hypoxic respiratory failure	-	hypoxic respiratory failure from COVID-19 and RSV	-	False Negative
P-NP-110	upper respiratory swab	Adenovirus +	Mastadenovirus B	33000000	upper respiratory infection	1	fever, night sweats	-	-
P-NP-111	upper respiratory swab	Adenovirus +	Mastadenovirus C	11000	upper respiratory infection	1	fever, congestion, bulging tympanic membrane	-	-
	upper respiratory swab	RSV+	RSV B	170	upper respiratory infection	1	fever, congestion, bulging tympanic membrane	-	-
P-NP-112	upper respiratory swab	Metapneumovirus +	Metapneumovirus	490000	upper respiratory infection	1	fever, cough	-	-
P-NP-113	upper respiratory swab	Adenovirus +	Mastadenovirus C	3600000	bronchiolitis	2	fever, wheezing	-	-
		MPV+	Metapneumovirus	16000				-	-
			Bocavirus	140000				Not Detected	-
P-NP-114	upper respiratory swab	ParainFluenza 3	Respirovirus 3; Merkel Cell Polyomavirus	6400	asymptomatic viral infection	0	chronic hypersensitivity pneumonitis, improving	-	-
P-NP-115	upper respiratory swab	ParainFluenza 3	Respirovirus 3	2500000	respiratory failure with intubation / mechanical ventilation	3	respiratory failure with intubation / mechanical ventilation	-	-
P-NP-116	upper respiratory swab	ParainFluenza 3	Respirovirus 3; Merkel Cell Polyomavirus	1900	dizziness and hypotension	0	dizziness and hypotension unrelated to respiratory infection	-	-
P-NP-117	upper respiratory swab	Metapneumovirus +	Metapneumovirus	240	upper respiratory infection	1	cough, congestion, fever, no supplemental oxygen needed	-	-
P-NP-118	upper respiratory swab	Metapneumovirus +	Metapneumovirus	1800000	respiratory distress with hypoxia	2	respiratory distress with hypoxia	-	-
P-NP-119	upper respiratory swab	Metapneumovirus +	Metapneumovirus	170000	cardiogenic shock	0	cardiogenic shock unrelated to respiratory infection	-	-
P-NP-120	upper respiratory swab	Metapneumovirus +	Metapneumovirus; CMV	790	cough, congestionn, and hypoxia	2	cough, congestionn, and hypoxia	-	-
P-NP-121	upper respiratory swab	Adenovirus +	Mastadenovirus C	1200000	upper respiratory infection	1	fever	-	-
P-NP-122	upper respiratory swab	ParainFluenza 1	Respirovirus 1	57	upper respiratory infection	1	fever, congestion, first-time seizure	-	-
BAL072	bronchoalveolar lavage Fluid	Rhinovirus/Enterovirus +	Rhinovirus A	130000	upper respiratory infection	1	chronic cough, SOB	-	-
			Alphaherpesvirus 1, CMV, Betaherpesvirus 7					-	-
BAL090	bronchoalveolar lavage Fluid	Rhinovirus/Enterovirus +	Rhinovirus A	23000000	pneumonia	2	pneumonia with increased opacities in right upper lobes	-	-
BAL105	bronchoalveolar lavage Fluid	RSV A+	Respiratory virus not detected; CMV	-	asymptomatic viral infection	0	history of RSV infection	-	False Negative
BAL107	bronchoalveolar lavage Fluid	Flu A+	Flu A (H1N1)	610000	non-infectious pneumonitis with sporadic detection of inFluenza A virus	0	non-infectious pneumonitis with sporadic detection of inFluenza A virus	-	-
BAL139	bronchoalveolar lavage Fluid	Rhinovirus/Enterovirus +	Rhinovirus A	12000	asymptomatic viral infection	0	rhinovirus not thought to be involved in patient's disease	-	-
BAL147	bronchoalveolar lavage Fluid	Rhinovirus/Enterovirus +	Rhinovirus A	1600000	asymptomatic viral infection	0	rhinovirus not thought to be involved in patient's disease	-	-
